# Supplementary material for: Human Rotavirus VP6-Specific Antibodies Mediate Intracellular Neutralization by Binding to a Quaternary Structure in the Transcriptional Pore
Source: PubMed Central journal article supplement (PMC3650007; doi:10.1371/journal.pone.0061101), 2013-05-09
Supplement: pone.0061101.s001.pdf [file pone.0061101.s001.pdf]

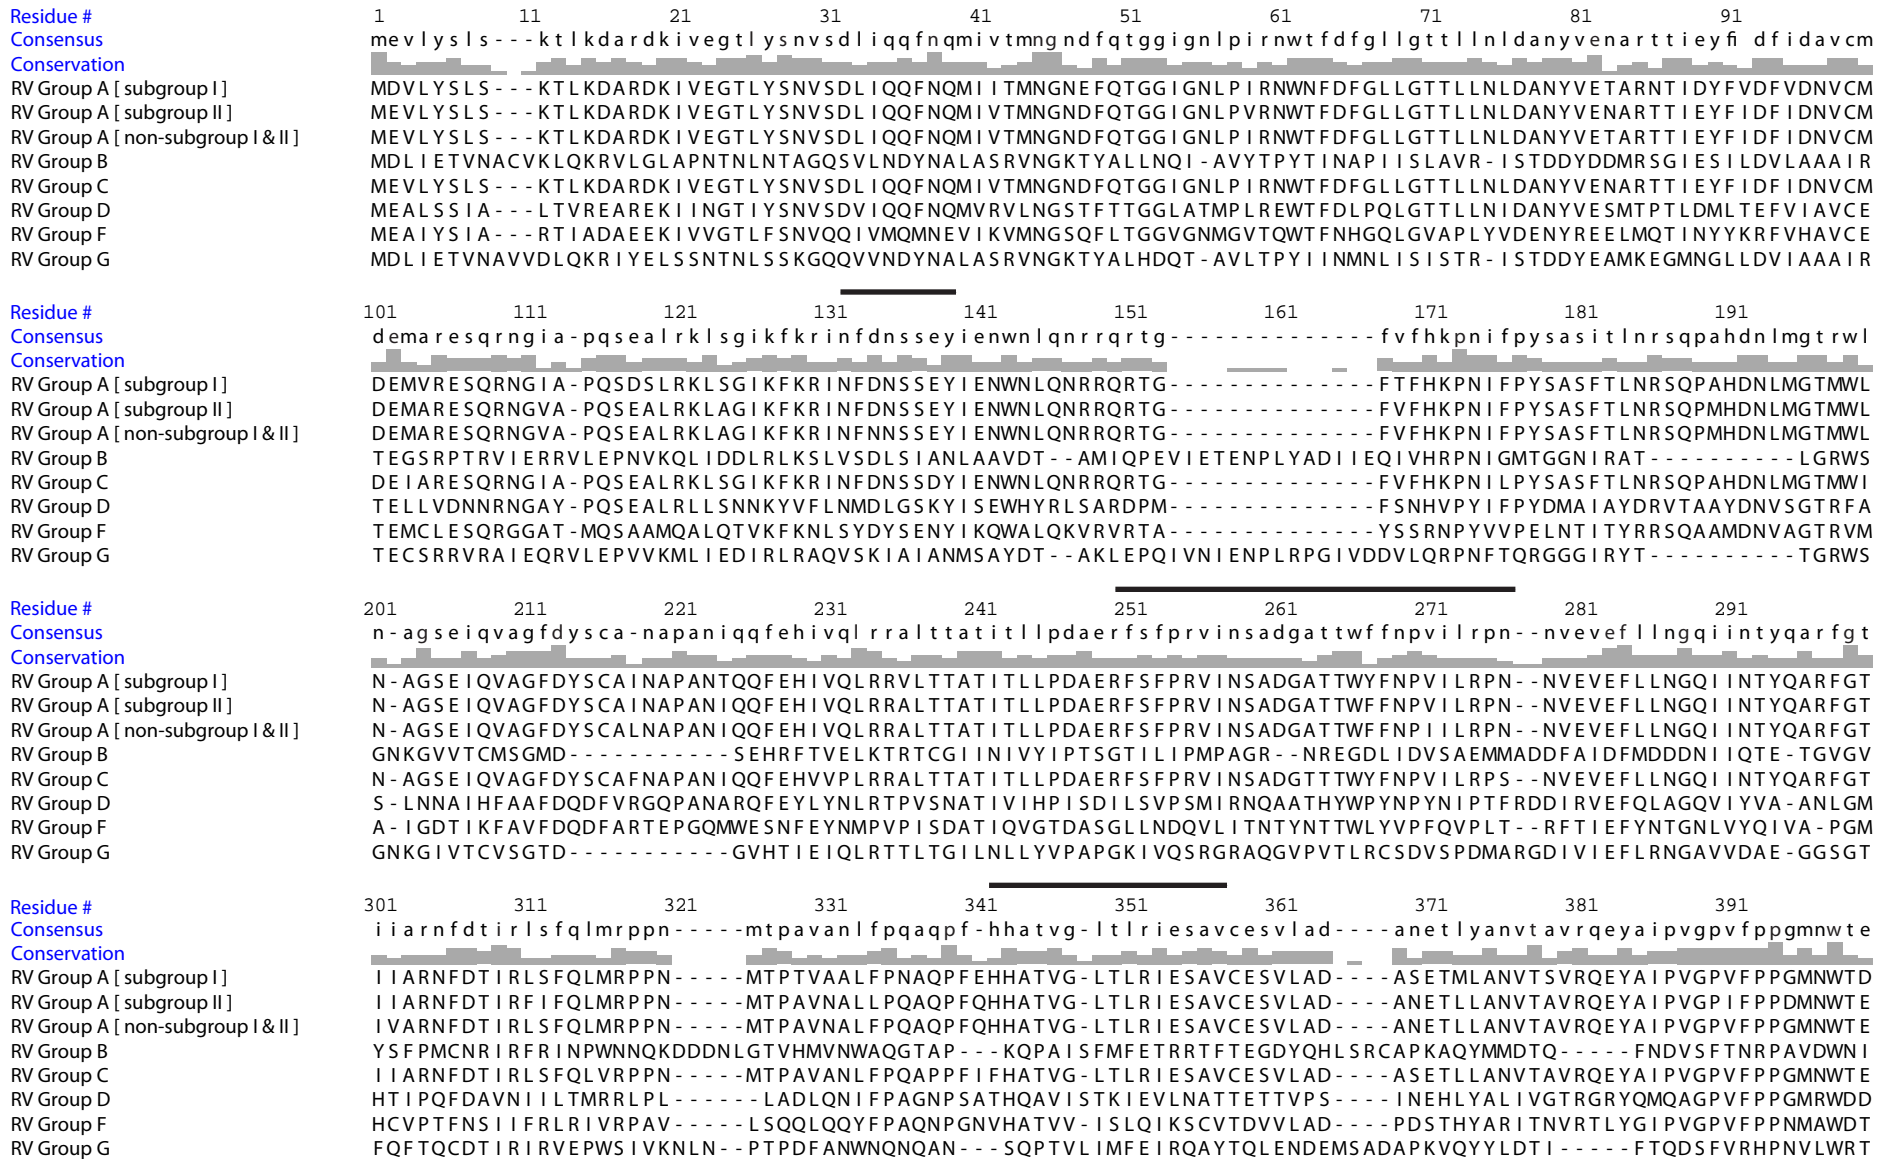

**Figure S1. Alignment of group A and non-group A rotavirus VP6 sequences showing conservation of the negatively-charged surface electrostatic potential in the VP6 trimer.** Alignment of representative sequences from group A and non-group A rotavirus VP6 sequences (specific strains are shown in table below) was performed using ClustalW2, the multiple sequence alignment computer program. Numbers at the top indicate the residue number. Small letters represent 1-letter residue abbreviations of the consensus VP6 sequence based on the aligned representative VP6 sequences. The gray bar graphs represent identity histograms showing conservation levels of individual residues at each position. The dashes within the sequences indicate absence of residues from the specific strain sequences accessed from Genbank. Residues below the solid black line indicate those that are shown to contribute to the negatively-charged electrostatic patch within the VP6 trimers.
