# Supplementary material for: Human Rotavirus VP6-Specific Antibodies Mediate Intracellular Neutralization by Binding to a Quaternary Structure in the Transcriptional Pore
Source: PubMed Central journal article supplement (PMC3650007; doi:10.1371/journal.pone.0061101), 2013-05-09
Supplement: pone.0061101.s002.pdf [file pone.0061101.s002.pdf]

**Table S1:** Sources of the VP6 sequences used for alignment analysis of conserved negative patch

| <b>Rotavirus Group</b>        | <b>Strain</b>                        | <b>Genbank Accension</b> |
|-------------------------------|--------------------------------------|--------------------------|
| Group A (subgroup I)          | Human rotavirus A/1076               | BAA00237                 |
| Group A (subgroup II)         | Human rotavirus A                    | CAA41010                 |
| Group A (non-subgroup I & II) | Human rotavirus A/CMH185/01          | ABY82714                 |
| Group B                       | Human rotavirus group B/India        | BAB20454                 |
| Group C                       | Porcine rotavirus/WH-a/2010          | AER25319                 |
| Group D                       | Rotavirus D chicken/05V0049/DEU/2005 | ADN06428                 |
| Group F                       | Rotavirus F chicken/03V0568/DEU/2003 | ADZ44637                 |
| Group G                       | Rotavirus G chicken/03V0567/DEU/2003 | ADZ44638                 |
