# Supplementary material for: Human Rotavirus VP6-Specific Antibodies Mediate Intracellular Neutralization by Binding to a Quaternary Structure in the Transcriptional Pore
Source: PubMed Central journal article supplement (PMC3650007; doi:10.1371/journal.pone.0061101), 2013-05-09
Supplement: pone.0061101.s004.pdf [file pone.0061101.s004.pdf]

**Table S2. Data collection and refinement statistics**

---

**Data collection**

|                  |                                                 |
|------------------|-------------------------------------------------|
| Space group      | P2 <sub>1</sub>                                 |
| Cell parameters  | a=68.10<br>b=97.92<br>c=94.23<br>$\beta$ =108.9 |
| Wavelength       | 0.97850                                         |
| Resolution (Å)   | 50-2.6                                          |
| Completeness (%) | 50-2.25 Å: 99.7 (100)                           |
| Redundancy       | 50-2.6 Å: 4.2(4.2)                              |
| I/signal         | 50-2.6 Å: 8.5(2.2)                              |

**Refinement**

|                                       |                                                  |
|---------------------------------------|--------------------------------------------------|
|                                       | 50-2.6 Å                                         |
| Resolution (Å)                        |                                                  |
| No. reflections                       | 35,513                                           |
| Working set                           |                                                  |
| No. reflections free set              | 1,778                                            |
| $R_{\text{work}} / R_{\text{free}}$ % | 20.07/23.50                                      |
| R.m.s. deviations                     |                                                  |
| Bond lengths (Å)                      | 0.004                                            |
| Bond angles (°)                       | 1.108                                            |
| Ramachandran Plot                     | Favored=98.1%<br>Allowed=1.65%<br>Outliers=0.24% |
